# Supplementary material for: CO2 Levels Modulate Carbon Utilization, Energy Levels and Inositol Polyphosphate Profile in Chlorella
Source: MDPI journal article supplement (doi:10.3390/plants12010129), 2022-12-27
Supplement: s1 [file plants-2096370-supplementary.pdf › plants-2096370-supplementary.pdf]

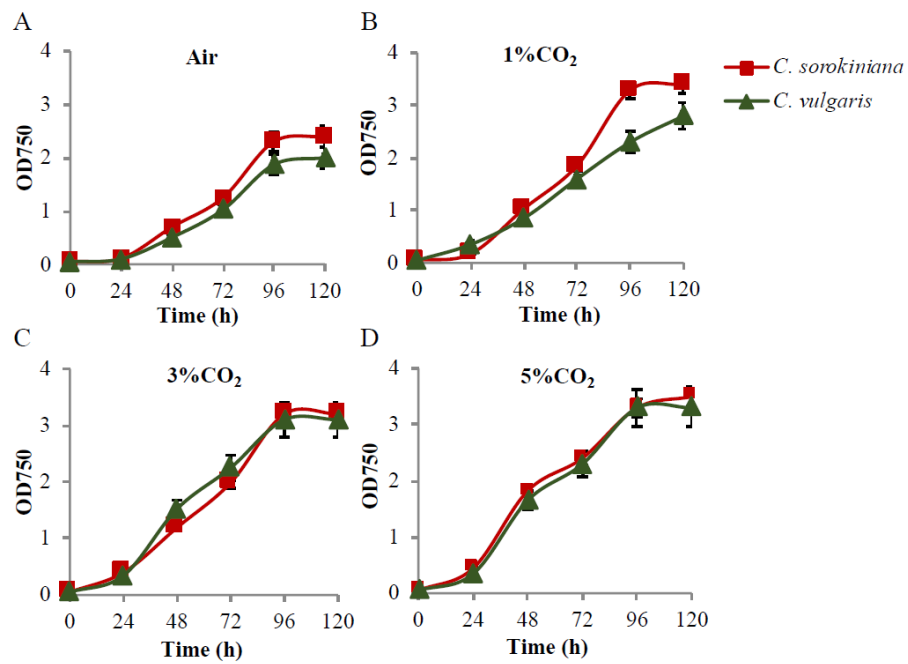

**Figure S1.** Growth curves from liquid cultures of the indicated strains supplemented with air, 1%, 3% and 5% CO<sub>2</sub>. Data correspond to the mean  $\pm$  SE of three biological replicates performed in triplicate.

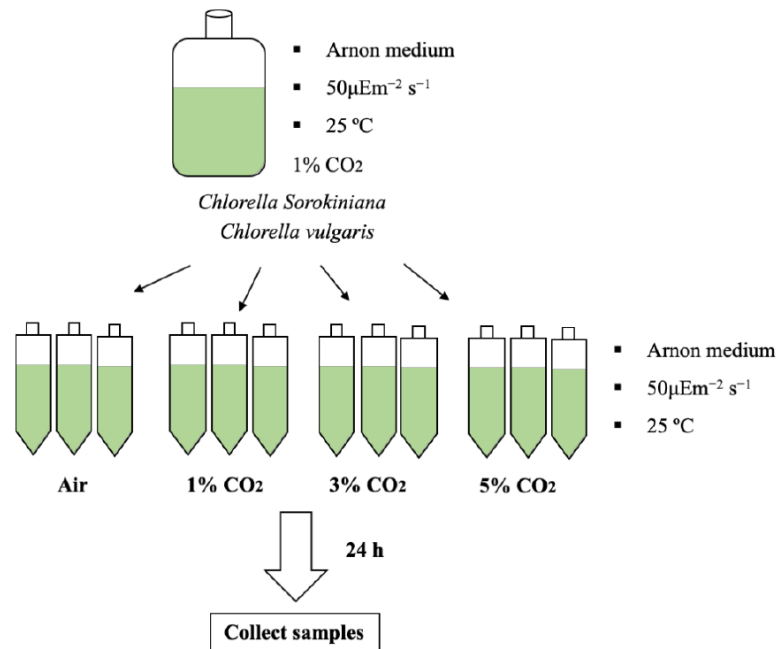

**Figure S2.** Schematic representation of the experimental data collection.
